# Supplementary material for: Brain leukocyte infiltration initiated by peripheral inflammation or experimental autoimmune encephalomyelitis occurs through pathways connected to the CSF-filled compartments of the forebrain and midbrain
Source: J Neuroinflammation. 2012 Aug 7;9:187. doi: 10.1186/1742-2094-9-187 (PMC3458946; doi:10.1186/1742-2094-9-187)
Supplement: Additional file 4 — Cisternal CD45+infiltrating cells, and perivascular infiltrating cells, are negative for TUNEL staining during the first clinical episode in EAE-diseased rats. [file 1742-2094-9-187-S4.pdf]

Schmitt C, et al: Brain leukocyte infiltration initiated by peripheral inflammation or EAE occurs through pathways connected to the CSF-filled compartments of the forebrain and midbrain.

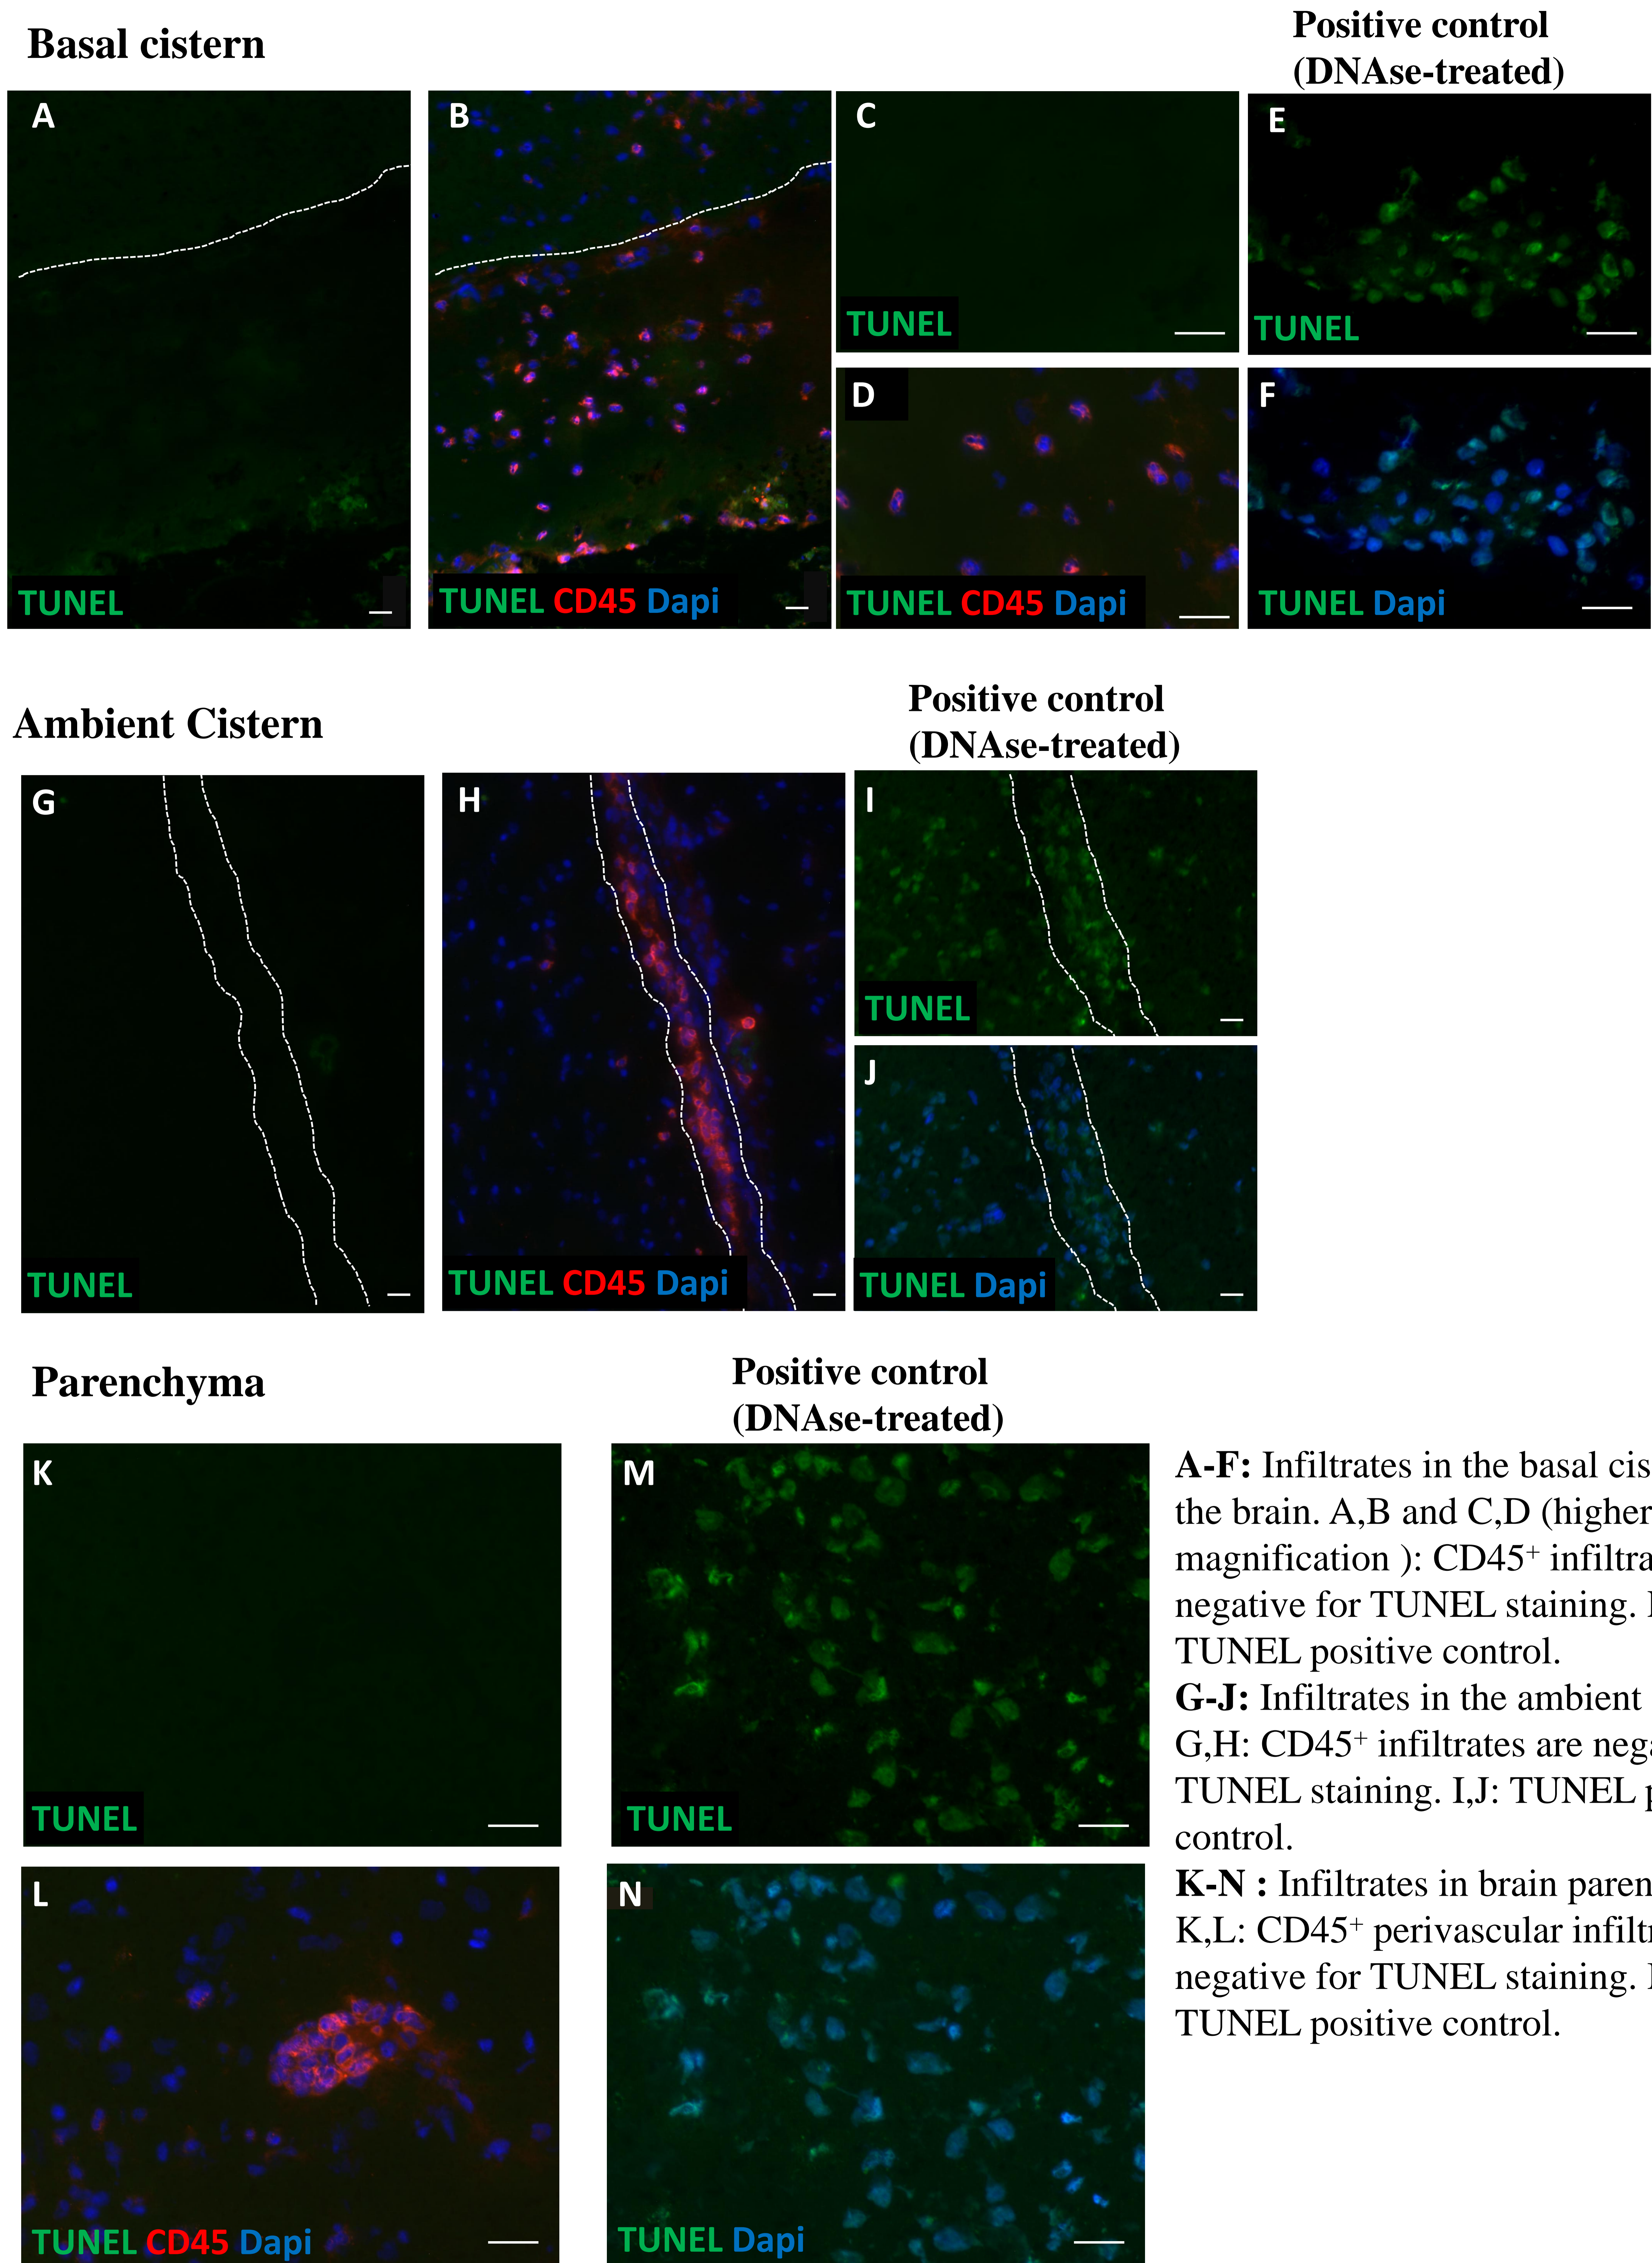

**Cisternal CD45<sup>+</sup> infiltrating cells, and perivascular infiltrating cells, are negative for TUNEL staining during the first clinical episode in EAE-diseased rats.**

TUNEL positive controls are obtained by treating the sections with DNase I. Scale bar : 20 μm. Dashed lines delimit the CSF spaces.
